# Supplementary material for: Three-in-one synergistic therapy for tooth whitening and biofilm eradication using Cu-doped Bi2WO6
Source: Royal Society of Chemistry journal article supplement (doi:10.1039/d3qm01050c), 2023-12-02
Supplement: d3qm01050c1.pdf [file d3qm01050c1.pdf]

## Supporting Information for

# Three-in-One Synergistic Therapy for Tooth Whitening and Biofilm Eradication using Cu doped $\text{Bi}_2\text{WO}_6$

Shujuan Liu<sup>\*a,b</sup>, Ruoxuan Chen<sup>a,b</sup>, Yunsong Wang<sup>a,b</sup>, Wangyang Zhang<sup>a,b</sup>, Zijian Zhang<sup>a,b</sup>, Yanfeng Hou<sup>a,b</sup>, Liangcan He<sup>\*b,c</sup>, Feng Tian<sup>a,b</sup>, Shaoqin Liu<sup>\*b,c</sup>

<sup>a</sup> School of Materials Science and Engineering, Harbin Institute of Technology, Harbin 150001, P. R. China

<sup>b</sup> Key Laboratory of Micro-Systems and Micro-Structures Manufacturing, Ministry of Education, Harbin Institute of Technology, Harbin 150001, P. R. China

<sup>c</sup> School of Medicine and Health, Harbin Institute of Technology, Harbin 150001, P. R. China

E-mail address: liusj0817@hit.edu.cn, liangcanhe@hit.edu.cn, shaoqinliu@hit.edu.cn

**Table S1.** The quantitative calculation of the peak areas of O1s and W4f for different samples.

|     |                  | $\text{Bi}_2\text{WO}_6$ | 0.5CBWO |
|-----|------------------|--------------------------|---------|
| O1s | Bi-O             | 30.1%                    | 26.3%   |
|     | W-O              | 45.6%                    | 47.5%   |
|     | Adsorbent Oxygen | 24.3%                    | 27.5%   |
| W4f | $\text{W}^{5+}$  | 45.7%                    | 49.7%   |
|     | $\text{W}^{6+}$  | 54.3%                    | 50.3%   |

**Table S2.** Actual and theoretical doping amounts of Cu in 0.5CBWO

| Element | Atomic% | Actual doping amount of Cu (wt%) | Theoretical doping amount of Cu (wt%) |
|---------|---------|----------------------------------|---------------------------------------|
| Bi4f    | 16.76   |                                  |                                       |
| Cu2p    | 0.14    | 0.53%                            | 0.5%                                  |
| W4f     | 5.82    |                                  |                                       |
| O1s     | 54.84   |                                  |                                       |

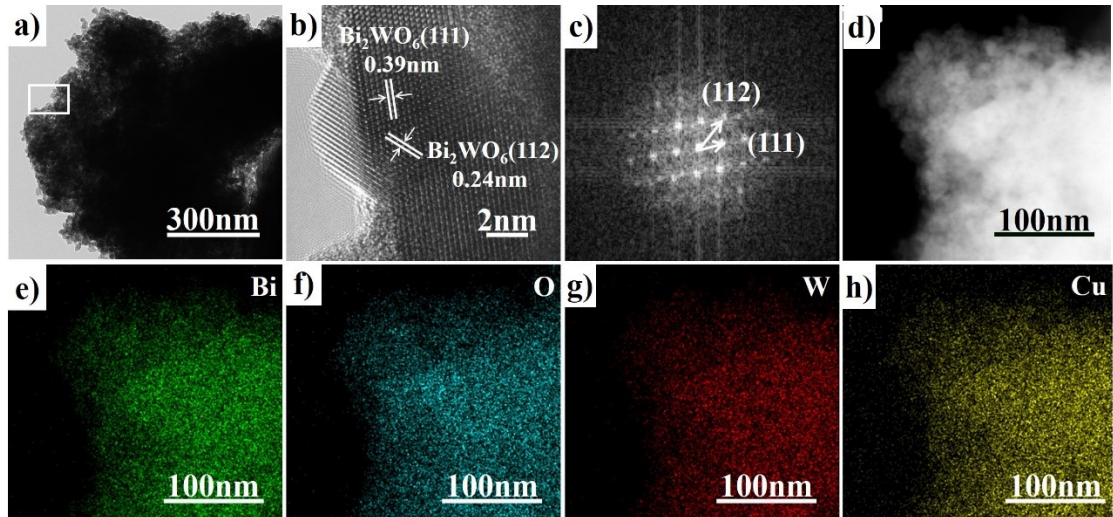

**Fig. S1.** TEM images and EDS elemental mappings for 0.5CBWO: a) TEM image; b) HRTEM image; c) FFT pattern; d) STEM image; e-h) element maps for Bi, O, W and Cu.
